# Supplementary material for: Moderate evidence for a Lombard effect in a phylogenetically basal primate
Source: PeerJ. 2016 Aug 16;4:e2328. doi: 10.7717/peerj.2328 (PMC4991872; doi:10.7717/peerj.2328)
Supplement: Data S1 [file peerj-04-2328-s001.xlsx]

## Sheet: Tabelle1
Subject	call type	condition	Playback noise level [ dB SPL]	conditionB	Position corrected call amplitude [dB SPL]
F1	short whistle	no noise		0	67.3
F1	short whistle	no noise		0	70.6418
F1	short whistle	no noise		0	65.5405
F1	short whistle	no noise		0	78.9232
F1	short whistle	no noise		0	81.1802
F1	short whistle	no noise		0	88.127
F1	short whistle	no noise		0	88.2981
F1	short whistle	no noise		0	86.6508
F1	short whistle	noise	65	2	93.4976
F1	short whistle	noise	65	2	95.6941
F1	short whistle	noise	65	2	94.842
F1	short whistle	noise	65	2	97.9394
F1	short whistle	noise	65	2	92.991
F1	short whistle	noise	65	2	95.808
F1	short whistle	noise	65	2	94.13
F1	short whistle	noise	65	2	91.2461
F1	short whistle	noise	65	2	78.4462
F1	short whistle	noise	65	2	89.5122
F1	short whistle	noise	65	2	92.268
F1	short whistle	noise	65	2	96.6265
F2	short whistle	no noise		0	71.1022
F2	short whistle	no noise		0	70.9414
F2	short whistle	no noise		0	73.1502
F2	short whistle	no noise		0	81.6534
F2	short whistle	no noise		0	77.3813
F2	short whistle	no noise		0	78.9807
F2	short whistle	no noise		0	70.2114
F2	short whistle	no noise		0	76.8831
F2	short whistle	no noise		0	70.0724
F2	short whistle	no noise		0	72.6687
F2	short whistle	no noise		0	75.543
F2	short whistle	no noise		0	76.1666
F2	short whistle	no noise		0	73.0531
F2	short whistle	no noise		0	73.0471
F2	short whistle	no noise		0	74.3333
F2	short whistle	no noise		0	78.5685
F2	short whistle	no noise		0	68.5534
F2	short whistle	no noise		0	72.5614
F2	short whistle	noise	60	1	80.954
F2	short whistle	noise	60	1	82.2602
F2	short whistle	noise	60	1	84.994
F2	short whistle	noise	60	1	84.1938
F2	short whistle	noise	60	1	85.1572
F2	short whistle	noise	60	1	86.7512
F2	short whistle	noise	60	1	89.8861
F2	short whistle	noise	60	1	83.595
F2	short whistle	noise	60	1	82.1236
F2	short whistle	noise	60	1	84.6652
F2	short whistle	noise	60	1	85.3396
F2	short whistle	noise	60	1	85.1907
F2	short whistle	noise	60	1	85.9995
F2	short whistle	noise	60	1	85.0812
F2	short whistle	noise	60	1	87.2012
F2	short whistle	noise	60	1	83.591
F2	short whistle	noise	60	1	85.2353
F2	short whistle	noise	60	1	86.4018
F2	short whistle	noise	60	1	86.4675
F2	short whistle	noise	60	1	88.3517
F2	short whistle	noise	60	1	78.1465
F2	short whistle	noise	60	1	86.3937
F2	short whistle	noise	60	1	75.9757
F2	short whistle	noise	60	1	80.6169
F2	short whistle	noise	60	1	82.8167
F2	short whistle	noise	60	1	83.0039
F2	short whistle	noise	60	1	79.6559
F2	short whistle	noise	60	1	90.7186
F2	short whistle	noise	60	1	91.1401
F2	short whistle	noise	60	1	86.5462
F2	short whistle	noise	60	1	85.1735
F2	short whistle	noise	60	1	90.0489
F2	short whistle	noise	60	1	94.1385
F2	short whistle	noise	60	1	93.0714
F2	short whistle	noise	60	1	95.1481
F3	short whistle	no noise		0	81.1642
F3	short whistle	no noise		0	85.8902
F3	short whistle	no noise		0	86.5583
F3	short whistle	no noise		0	86.9825
F3	short whistle	no noise		0	88.1536
F3	short whistle	no noise		0	92.7122
F3	short whistle	no noise		0	91.5259
F3	short whistle	noise	70	3	82.5206
F3	short whistle	noise	70	3	83.272
F3	short whistle	noise	70	3	87.6867
F3	short whistle	noise	70	3	86.4008
F3	short whistle	noise	70	3	83.8054
F3	short whistle	noise	70	3	82.3077
M1	trill	no noise		0	89.0632
M1	trill	no noise		0	89.7133
M1	trill	no noise		0	60.5497
M1	trill	no noise		0	57.8999
M1	trill	no noise		0	83.5977
M1	trill	no noise		0	88.9957
M1	trill	no noise		0	65.4061
M1	trill	no noise		0	50.4125
M1	trill	no noise		0	62.0173
M1	trill	noise	60	1	97.1186
M1	trill	noise	60	1	97.7835
M1	trill	noise	60	1	64.2707
M2	trill	no noise		0	61.6878
M2	trill	no noise		0	61.9191
M2	trill	no noise		0	85.5427
M2	trill	no noise		0	96.9667
M2	trill	no noise		0	62.0504
M2	trill	no noise		0	57.8148
M2	trill	no noise		0	62.984
M2	trill	no noise		0	62.7882
M2	trill	no noise		0	69.1937
M2	trill	noise	60	1	71.0642
M2	trill	noise	60	1	62.5903
M2	trill	noise	60	1	68.0616
M2	trill	noise	60	1	69.6703
M2	trill	noise	60	1	87.7159
M2	trill	noise	60	1	62.0857
M2	trill	noise	60	1	59.5172
M2	trill	noise	60	1	57.2343
M2	trill	noise	60	1	58.3629
M2	trill	noise	60	1	60.7229
M3	trill	no noise		0	62.0132
M3	trill	no noise		0	61.1764
M3	trill	no noise		0	86.4828
M3	trill	no noise		0	58.3118
M3	trill	no noise		0	65.4579
M3	trill	no noise		0	56.2619
M3	trill	noise	60	1	66.117
M3	trill	noise	60	1	59.867
M3	trill	noise	60	1	62.5287
M3	trill	noise	60	1	61.8855
M3	trill	noise	60	1	59.2698
M3	trill	noise	60	1	64.6775
M3	trill	noise	60	1	71.1668
M3	trill	noise	60	1	87.5893
